# Supplementary material for: Binding of cytoskeletal proteins with silver nanoparticles
Source: Royal Society of Chemistry journal article supplement (doi:10.1039/c3ra43281e), 2013-01-01
Supplement: c3ra43281e.pdf [file c3ra43281e.pdf]

## Supporting Information

### Binding of Cytoskeletal Proteins with Silver Nanoparticles

Yimei Wen, Nicholas K. Geitner, Ran Chen, Feng Ding, Pengyu Chen, Rachel E. Andorfer,  
Praveen Nedumpully Govindan and Pu Chun Ke

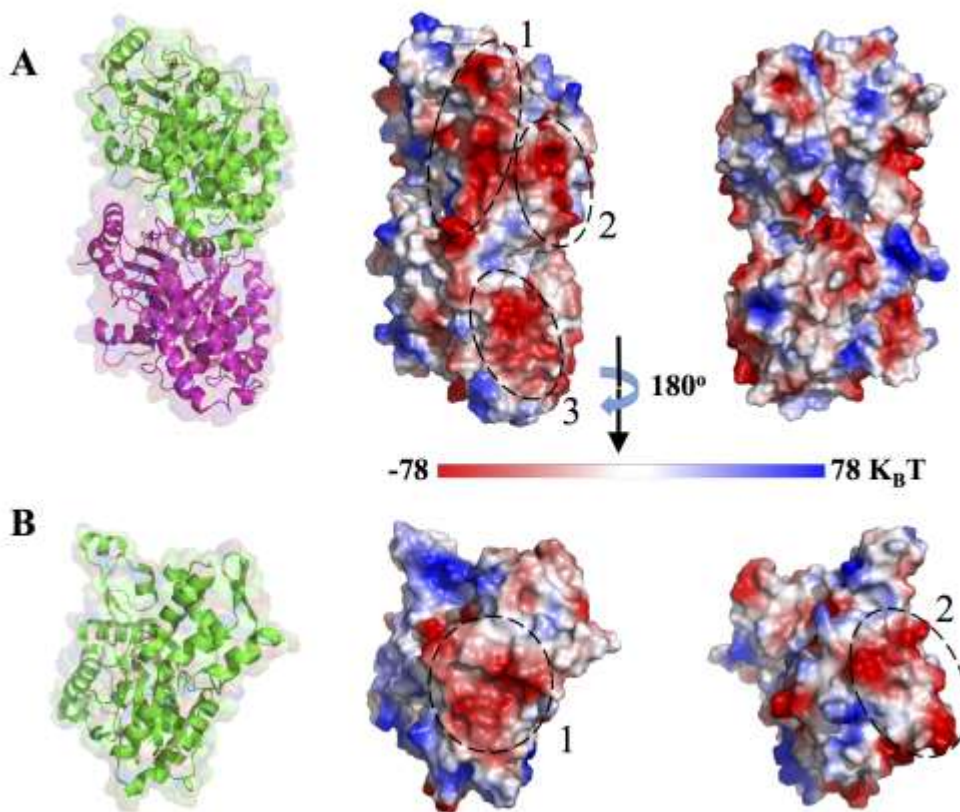

**Fig. S1** Structures and potential NP-binding sites of Tubulin dimer (A) and Actin (B). The left panels correspond to the 3D structures in cartoon representations. The molecular surfaces are shown with high transparency. The alpha- and beta-tubulin molecules are colored differently. The middle panels illustrate the electrostatic potentials (computed using PyMol, [www.pymol.org](http://www.pymol.org)) on the corresponding molecular surface, where red corresponds to negative energy and blue denotes positive electrostatic potential. The right panels show the same surfaces from a different view point. Based on previous experimental<sup>1</sup> and computational<sup>2,3</sup> studies, AgNP has a preference to bind the negatively charged protein surfaces. We highlighted the NP-binding clusters with dashed circles, corresponding to well-defined surface patches featuring low

electrostatic potentials. Specifically, for tubulin dimer (A), cluster 1 on alpha-tubulin consists of residues 386, 392, 396, 415, 423, 429, 433, and 439, cluster 2 on alpha-tubulin consists of residues 155, 196, 414, 417, 420, 424, 431, and 434, and cluster 3 on beta-tubulin consists of residues 110, 113, 159, 196, 411, 414, 417, 420, 427, and 431. For actin (B), cluster 1 consists of residues 222, 224, 259, 265, 270, 276, and 316 while cluster 2 consists of residues 51, 80, 83, 99, 100, 125, 363, and 364, respectively.

(a)

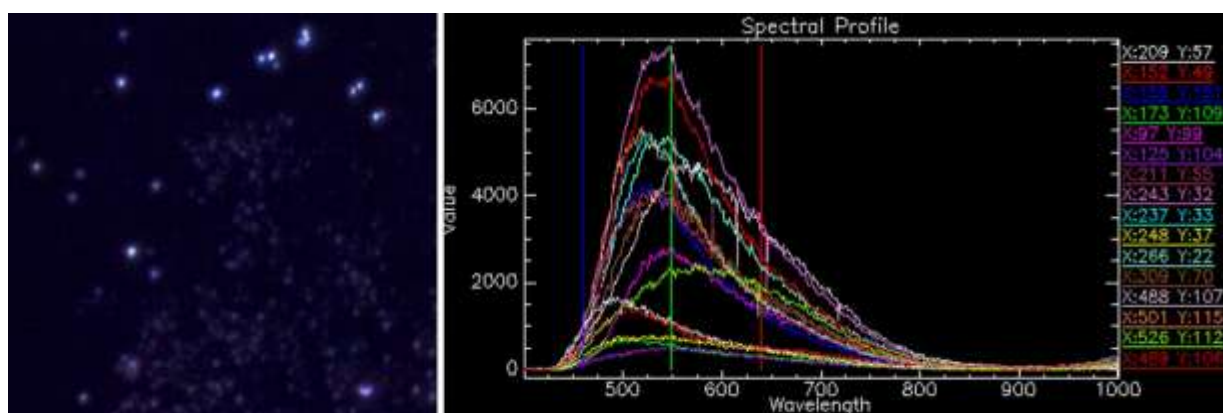

(b)

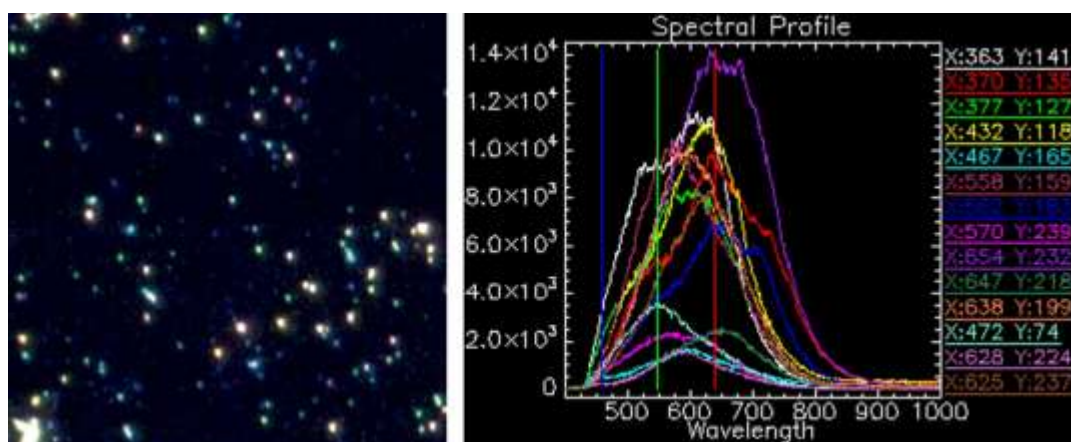

**Fig. S2** (A, B) Exemplary CytoViva images and their corresponding hyperspectra for actin-AgNP and tubulin-AgNP at 2 h, respectively. (B) The double-shoulder spectra for tubulin-AgNP indicate an aggregation-induced quadrupole resonance that is different from the primary resonance in electron oscillation.

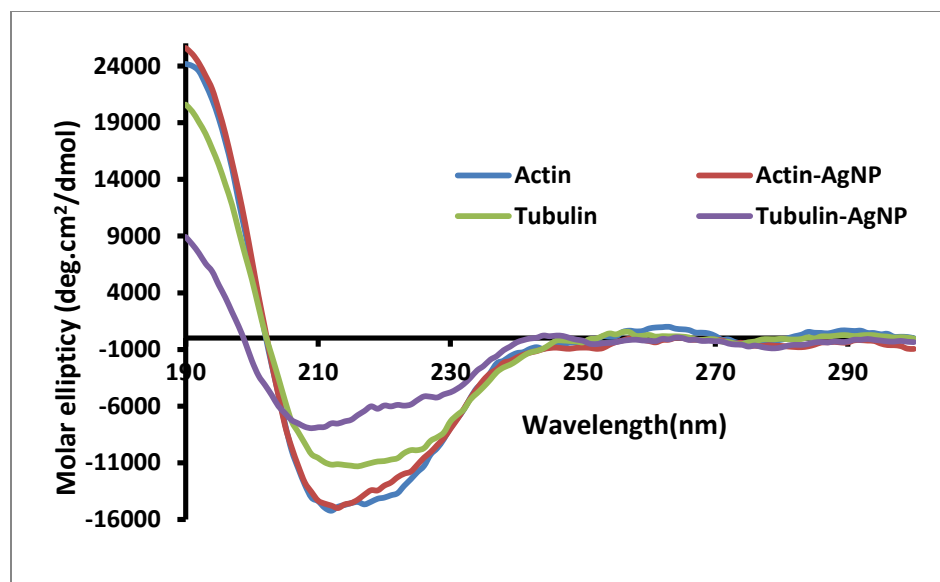

**Fig. S3** Circular dichroism spectra of cytoskeletal protein (0.25 mg/ml) and cytoskeletal protein mixed with AgNPs (0.05 mg/ml).

| Secondary structure percentages | Actin | Actin-AgNPs | Tubulin | Tubulin-AgNPs |
|---------------------------------|-------|-------------|---------|---------------|
| Helix                           | 38    | 29          | 35      | 29            |
| Sheet                           | 25    | 34          | 21      | 22            |
| Turns                           | 16    | 17          | 16      | 20            |
| Others                          | 21    | 20          | 28      | 29            |

**Table. S1** Secondary structure percentages of cytoskeletal protein (0.25 mg/ml) and cytoskeletal protein mixed with AgNPs (0.05 mg/ml) (derived from the CD measurement).

### References:

1. L. Calzolari, F. Franchini, D. Gilliland, and F. Rossi, *Nano Lett.* 2010, **10**, 3101-3105.
2. F. Ding, S. Radic, R. Chen, P. Chen, N. K. Geitner, J. M. Brown, and P. C. Ke, *Nanoscale*, 2013 (DOI: 10.1039/c3nr02147e).
3. A. Kaminen, F. Ding, P. Chen, M. Mortimer, A. Kahru, and P. C. Ke, *Nanotechnology* 2013, **34**, 345101.
